# Supplementary material
Source: publisher site journal article supplement (https://www.dovepress.com/article/560234)
Supplement: Supplementary file 1 [file Supplementary%20Material.docx]

**Supplementary Materials**

**Text S1.** Methods for the measurement of blood pressure, blood glucose, blood lipids, uric acid and creatinine

Participants were required to fast for at least 8 hours before venous blood sample collection. In this study, fasting venous blood samples were collected using separation glue tubes. After being left at room temperature for 30 minutes, the samples were centrifuged for 10 minutes in a horizontal centrifuge to isolate the serum. Biochemical indicators, including blood creatinine, blood uric acid, serum glucose, and total cholesterol, were measured using a Siemens ADVIA2400 automatic biochemical analyzer and its original supporting reagents.

**Table S1.** Fit indices for models with metabolic pattern numbers ranging from 1 to 6.

| Classes | AIC | BIC | Entropy | BLRT_ p |
| --- | --- | --- | --- | --- |
| Female |  |  |  |  |
| 1 | 61378.25 | 61431.02 | 1.00 | 0.01 |
| 2 | 59843.53 | 59929.27 | 0.58 | 0.01 |
| 3 | 57037.31 | 57156.03 | 0.73 | 0.01 |
| 4 | 56681.32 | 56833.01 | 0.68 | 0.01 |
| 5 | 56680.24 | 56864.91 | 0.58 | 0.95 |
| 6 | 55265.83 | 55483.47 | 0.72 | 0.01 |
| Male |  |  |  |  |
| 1 | 35258.43 | 35306.76 | 1 | 0.01 |
| 2 | 34547.62 | 34626.15 | 0.53 | 0.01 |
| 3 | 32857.98 | 32966.72 | 0.7 | 0.01 |
| 4 | 32711.65 | 32850.58 | 0.66 | 0.01 |
| 5 | 32721.16 | 32890.3 | 0.48 | 0.45 |
| 6 | 32652.62 | 32851.97 | 0.56 | 0.01 |

Abbreviations: AIC, akaike information criterion; BIC, bayesian information criterion

**Table S2.** Criteria for determining abnormal metabolic indicators[1–3].

| **Indicators** | **Criteria** |
| --- | --- |
| Normal blood pressure | SBP < 120 mmHg and DBP < 80 mmHg |
| Hypertension | SBP ≥ 140 mmHg or/and DBP ≥ 90 mmHg, or those who had been diagnosed with hypertension or previously received antihypertensive therapy prior to the study. |
| Normal blood glucose | FBG < 5.6 mmol/L |
| Impaired fasting glucose | 5.6 mmol/L ≤ FBG < 6.9 mmol/L |
| Hyperglycemia | FBG ≥ 6.9 mmol/L or self-reported diabetes |
| Normal total cholesterol | TC < 5.2 mmol/L |
| Borderline dyslipidemia | 5.2 mmol/L ≤ TC < 6.2 mmol/L |
| Dyslipidemia | TC ≥ 6.2 mmol/L |

Abbreviations: DBP, diastolic blood pressure; FBG, fasting blood glucose; SBP, systolic blood pressure; TC, total cholesterol.

**Table S3.** Baseline metabolic patterns in Males (A) and Females (B).

| **Indicator** | **SBP, mmHg** | **DBP, mmHg** | **FBG, mmol/L** | **TC, mmol/L** | **n (%)** |
| --- | --- | --- | --- | --- | --- |
| Female |  |  |  |  |  |
| NMA | 120 | 74 | 5.34 | 5.13 | 2901(53.66%) |
| HIB | 140 | 86 | 5.61 | 5.54 | 2353(43.53%) |
| HHB | 140 | 80 | 10.39 | 5.53 | 152(2.81%) |
| Male |  |  |  |  |  |
| NMA | 124 | 80 | 5.55 | 4.75 | 1822(58.68%) |
| HIN | 148 | 90 | 5.77 | 4.97 | 1163(37.46%) |
| HHN | 140 | 84 | 11.65 | 4.99 | 120(3.87%) |

Abbreviations: DBP, diastolic blood pressure; FBG, fasting blood glucose; SBP, systolic blood pressure; TC, total cholesterol; HIB, hypertension-impaired fasting glucose-borderline dyslipidemia; HIN, hypertension-impaired fasting glucose-normal total cholesterol; HHB, hypertension-hyperglycemia-borderline dyslipidemia; HHN, hypertension-hyperglycemia-normal total cholesterol; NMA, no metabolic abnormalities.

**Table S4.** Risk of renal function decline in people aged 40-60 years with different metabolic patterns.

| Metabolic pattern ×Years | Model 1 |  | Model 2 |  |
| --- | --- | --- | --- | --- |
| OR (95% CI) | *P* | OR (95% CI) | *P* |
| **Female** |  |  |  |  |
| NMA × Years | Ref |  | Ref |  |
| HIB × Years | 1.09(1.03,1.17) | 0.01 | 1.09(1.03,1.17) | 0.01 |
| HHB × Years | 1.02(0.81,1.29) | 0.87 | 1.02(0.81,1.29) | 0.88 |
| **Male** |  |  |  |  |
| NMA × Years | Ref |  | Ref |  |
| HIN × Years | 0.87(0.66,1.15) | 0.87 | 0.87(0.66,1.15) | 0.34 |
| HHN × Years | 0.93(0.45,1.95) | 0.93 | 0.93(0.45,1.94) | 0.85 |

Note: Model 1 is unadjusted; Model 2 further adjusts for uric acid and BMI.

Abbreviations: BMI, body mass index; HIB, hypertension-impaired fasting glucose-borderline dyslipidemia; HIN, hypertension-impaired fasting glucose-normal total cholesterol; HHB, hypertension-hyperglycemia-borderline dyslipidemia; HHN, hypertension-hyperglycemia-normal total cholesterol; NMA, no metabolic abnormalities.

**Table S5.** Risk of renal function decline in people over 60 years of age with different metabolic patterns.

| Metabolic pattern ×Years | Model 1 |  | Model 2 |  |
| --- | --- | --- | --- | --- |
| OR (95% CI) | *P* | OR (95% CI) | *P* |
| **Female** |  |  |  |  |
| NMA × Years | Ref |  | Ref |  |
| HIB × Years | 0.98(0.96,1.00) | 0.11 | 0.98(0.96,1.00) | 0.10 |
| HHB × Years | 1.02(0.96,1.09) | 0.53 | 1.02(0.96,1.09) | 0.50 |
| **Male** |  |  |  |  |
| NMA × Years | Ref |  | Ref |  |
| HIN × Years | 1.33(1.25,1.40) | <0.001 | 1.37(1.32,1.43) | <0.001 |
| HHN × Years | 1.17(1.03,1.33) | 0.02 | 1.33(1.26,1.41) | <0.001 |

Note: Model 1 is unadjusted; Model 2 further adjusts for uric acid and BMI.

Abbreviations: BMI, body mass index; HIB, hypertension-impaired fasting glucose-borderline dyslipidemia; HIN, hypertension-impaired fasting glucose-normal total cholesterol; HHB, hypertension-hyperglycemia-borderline dyslipidemia; HHN, hypertension-hyperglycemia-normal total cholesterol; NMA, no metabolic abnormalities.

**Table S6.** eGFR trends in people aged 40-60 years with different metabolic patterns.

| Metabolic pattern ×Years | Model 1 |  | Model 2 |  |
| --- | --- | --- | --- | --- |
| β (95% CI) | *P* | β (95% CI) | *P* |
| **Female** |  |  |  |  |
| NMA × Years | Ref |  | Ref |  |
| HIB × Years | -0.38(-0.61, -0.16) | <0.001 | -0.39(-0.61, -0.16) | <0.001 |
| HHB × Years | 0.03(-0.78,0.83) | 0.95 | 0.04(-0.77,0.84) | 0.93 |
| **Male** |  |  |  |  |
| NMA × Years | Ref |  | Ref |  |
| HIN × Years | 0.26(-1.02,1.54) | 0.69 | 0.22(-1.09,1.53) | 0.74 |
| HHN × Years | 0.86(-2.21,3.93) | 0.58 | 0.84(-2.15,3.84) | 0.58 |

Note: Model 1 is unadjusted; Model 2 further adjusts for uric acid and BMI.

Abbreviations: BMI, body mass index; HIB, hypertension-impaired fasting glucose-borderline dyslipidemia; HIN, hypertension-impaired fasting glucose-normal total cholesterol; HHB, hypertension-hyperglycemia-borderline dyslipidemia; HHN, hypertension-hyperglycemia-normal total cholesterol; NMA, no metabolic abnormalities.

**Table S7.** eGFR trends in people over 60 years of age with different metabolic patterns.

| Metabolic pattern ×Years | Model 1 |  | Model 2 |  |
| --- | --- | --- | --- | --- |
| β (95% CI) | *P* | β(95% CI) | *P* |
| **Female** |  |  |  |  |
| NMA × Years | Ref |  | Ref |  |
| HIB × Years | 0.02(-0.09,0.14) | 0.66 | 0.03(-0.08,0.14) | 0.63 |
| HHB × Years | -0.48(-0.86, -0.10) | 0.01 | -0.48(-0.87, -0.10) | 0.01 |
| **Male** |  |  |  |  |
| NMA × Years | Ref |  | Ref |  |
| HIN × Years | -0.07(-0.36,0.22) | 0.63 | -0.07(-0.35,0.22) | 0.64 |
| HHN × Years | -0.56(-1.50,0.38) | 0.24 | -0.56(-1.50,0.38) | 0.24 |

Note: Model 1 is unadjusted; Model 2 further adjusts for uric acid and BMI.

Abbreviations: BMI, body mass index; HIB, hypertension-impaired fasting glucose-borderline dyslipidemia; HIN, hypertension-impaired fasting glucose-normal total cholesterol; HHB, hypertension-hyperglycemia-borderline dyslipidemia; HHN, hypertension-hyperglycemia-normal total cholesterol; NMA, no metabolic abnormalities

**Table S8.** Risk of renal function decline in non-overweight/obese people with different metabolic patterns.

| Metabolic pattern ×Years | Model 1 |  | Model 2 |  |
| --- | --- | --- | --- | --- |
| OR (95% CI) | *P* | OR (95% CI) | *P* |
| **Female** |  |  |  |  |
| NMA × Years | Ref |  | Ref |  |
| HIB × Years | 1.11(1.10,1.14) | 0.04 | 1.03(1.00,1.06) | 0.09 |
| HHB × Years | 1.12(1.10,1.14) | <0.001 | 1.10(1.00,1.22) | 0.06 |
| **Male** |  |  |  |  |
| NMA × Years | Ref |  | Ref |  |
| HIN × Years | 1.33(1.22,1.45) | <0.001 | 1.34(1.23,1.47) | <0.001 |
| HHN × Years | 1.05(0.88,1.26) | 0.59 | 1.04(0.86,1.27) | 0.66 |

Note: Model 1 is unadjusted; Model 2 further adjusts for age and uric acid. Non-overweight/obese: BMI 24 < kg/m2; overweight: 24kg/m2 ≤ BMI < 28 kg/m2; obesity: BMI ≥ 28kg/m2.

Abbreviations: BMI, body mass index; HIB, hypertension-impaired fasting glucose-borderline dyslipidemia; HIN, hypertension-impaired fasting glucose-normal total cholesterol; HHB, hypertension-hyperglycemia-borderline dyslipidemia; HHN, hypertension-hyperglycemia-normal total cholesterol; NMA, no metabolic abnormalities.

**Table S9.** Risk of renal function decline in overweight and obese people with different metabolic patterns.

| Metabolic pattern×Years | Model 1 |  | Model 2 |  |
| --- | --- | --- | --- | --- |
| OR (95% CI) | *P* | OR (95% CI) | *P* |
| **Female** |  |  |  |  |
| NMA × Years | Ref |  | Ref |  |
| HIB × Years | 1.01(0.98,1.04) | 0.69 | 1.01(0.97,1.04) | 0.71 |
| HHB × Years | 1.01(0.94,1.09) | 0.77 | 1.01(0.94,1.10) | 0.74 |
| **Male** |  |  |  |  |
| NMA × Years | Ref |  | Ref |  |
| HIN × Years | 1.20(1.13,1.29) | <0.001 | 1.21(1.13,1.30) | <0.001 |
| HHN × Years | 1.17(0.98,1.39) | 0.08 | 1.16(0.96,1.40) | 0.11 |

Note: Model 1 is unadjusted; Model 2 further adjusts for age and uric acid. Non-overweight/obese: BMI < 24 kg/m2; overweight: 24kg/m2 ≤ BMI < 28 kg/m2; obesity: BMI ≥ 28kg/m2.

Abbreviations: BMI, body mass index; HIB, hypertension-impaired fasting glucose-borderline dyslipidemia; HIN, hypertension-impaired fasting glucose-normal total cholesterol; HHB, hypertension-hyperglycemia-borderline dyslipidemia; HHN, hypertension-hyperglycemia-normal total cholesterol; NMA, no metabolic abnormalities.

**Table S10.** eGFR trends in non-overweight/obese people with different metabolic patterns.

| Metabolic pattern×Years | Model 1 |  | Model 2 |  |
| --- | --- | --- | --- | --- |
| β (95% CI) | *P* | β(95% CI) | *P* |
| **Female** |  |  |  |  |
| NMA × Years | Ref |  | Ref |  |
| HIB × Years | -0.22(-0.36,-0.08) | 0.02 | -0.23(-0.37,-0.09) | 0.03 |
| HHB × Years | -0.81(-1.46,-0.15) | 0.02 | -0.75(-1.41,-0.09) | 0.03 |
| **Male** |  |  |  |  |
| NMA × Years | Ref |  | Ref |  |
| HIN × Years | -0.20(-0.64,1.24) | 0.38 | -0.21(-0.64,1.23) | 0.35 |
| HHN × Years | 0.51(-0.54,1.57) | 0.33 | 0.57(-0.49,1.63) | 0.29 |

Note: Model 1 is unadjusted; Model 2 further adjusts for age and uric acid. Non-overweight/obese: BMI 24 < kg/m2; overweight: 24kg/m2 ≤ BMI < 28 kg/m2; obesity: BMI ≥ 28kg/m2.

Abbreviations: BMI, body mass index; HIB, hypertension-impaired fasting glucose-borderline dyslipidemia; HIN, hypertension-impaired fasting glucose-normal total cholesterol; HHB, hypertension-hyperglycemia-borderline dyslipidemia; HHN, hypertension-hyperglycemia-normal total cholesterol; NMA, no metabolic abnormalities.

**Table S11.** eGFR trends in overweight and obese people with different metabolic patterns.

| Metabolic pattern ×Years | Model 1 |  | Model 2 |  |
| --- | --- | --- | --- | --- |
| β (95% CI) | *P* | β (95% CI) | *P* |
| **Female** |  |  |  |  |
| NMA × Years | Ref |  | Ref |  |
| HIB × Years | -0.12(-0.27,0.03) | 0.12 | -0.13(-0.28,0.02) | 0.09 |
| HHB × Years | -0.40(-0.82,0.03) | 0.07 | -0.38(-0.81,0.05) | 0.08 |
| **Male** |  |  |  |  |
| NMA × Years | Ref |  | Ref |  |
| HIN × Years | -0.02(-0.40,0.36) | 0.92 | -0.04(-0.42,0.34) | 0.85 |
| HHN × Years | -1.06(-2.44,0.33) | 0.14 | -1.05(-2.41,0.32) | 0.13 |

Note: Model 1 is unadjusted; Model 2 further adjusts for age and uric acid. Non-overweight/obese: BMI 24 < kg/m2; overweight: 24kg/m2 ≤ BMI < 28 kg/m2; obesity: BMI ≥ 28kg/m2.

Abbreviations: BMI, body mass index; HIB, hypertension-impaired fasting glucose-borderline dyslipidemia; HIN, hypertension-impaired fasting glucose-normal total cholesterol; HHB, hypertension-hyperglycemia-borderline dyslipidemia; HHN, hypertension-hyperglycemia-normal total cholesterol; NMA, no metabolic abnormalities.

**References**

[1] Bureau of Disease Prevention and Control, National Health Commission of People′s Republic of China; National Center for Cardiovascular Diseases, Chinese Academy of Medical Science & Peking Union Medical College, Fuwai Hospital; Chinese Center for Control and Prevention et al. National guideline for hypertension management in China (2019) [J]. Chinese journal of cardiology, 2020, 48(01): 10-46.

[2] Wang ZW, Guo YL. China Dyslipidemia Management Guidelines (Primary Care Version 2024) [J]. Chinese Circulation Journal, 2024, 39(4): 313-321.

[3] Chinese Diabetes Society. China Type 2 Diabetes Prevention and Control Guidelines (2020 Edition) (Part 1) [J]. Chinese Journal of Practical Internal Medicine, 2021, 41(8): 668-695.
